# Supplementary material for: Study of formation of cobalt and zinc phosphates in solvothermal synthesis using piperazine and 2-methylpiperazine as templating molecules. Structure investigations of [C4H8N2H4][(Co0.44(1)Zn0.56(1))2(PO4)(H1.5PO4)2] and of [C5N2H14][(Co0.25(3)Zn0.75(3))(HPO4)2]
Source: Royal Society of Chemistry journal article supplement (doi:10.1039/b009677f), 2001-01-01
Supplement: b009677f.doc [file b009677f.doc]

Tables of atomic coordinates and distances from the paper:

**Study of formation of Co and Zn phosphates in solvothermal synthesis using piperazine and 2-methylpiperazine as templating molecules. Structure investigations**

**of [(Co0.44(1)Zn0.56(1))2(PO4)(H1.5PO4)2]C4H8N2H4** **and of**

**[(Co0.25(3)Zn0.75(3))(HPO4)2]C5N2H14**

**Axel Nørlund Christensen*a** **Arnaud Baregesa, Renie Birkedal Nielsena, Rita Grønbæk Hazella, Poul Norbyb and Jonathan C. Hansonc**

*a Department of Inorganic Chemistry, University of Aarhus, DK-8000 Aarhus C, Denmark*

*b Department of Chemistry, University of Oslo, P.O. Box 1033 Blindern, N-0315 Oslo, Norway*

*c Chemistry Department, Brookhaven National Laboratory, Upton, New York 11973, U.S.A.*

Submitted to Dalton Transactions in March 2001.

**Table 1.** Atomic coordinates and equivalent displacement parameters for

[(Co0.44(1)Zn0.56(1))2(PO4)(H1.5PO4)2]C4H8N2H4.

______________________________________________________________________________

Atom *x*/*a* *y*/*b* *z*/*c* *Ueq/Uiso* (hydrogen atoms)

______________________________________________________________________________

Co, Zn 0.37925(2) 0.12185(2) 0.54005(3) 0.0067(1)

P1 0.50000 0.04033(6) 0.25000 0.0066(4)

P2 0.35863(4) 0.37097(5) 0.59994(7) 0.0083(3)

O1 0.4875(1) 0.1117(1) 0.3989(2) 0.010(1)

O2 0.4054(1) -0.0257(1) 0.2198(2) 0.013(1)

O3 0.2491(1) 0.3964(1) 0.5786(2) 0.018(1)

O4 0.3812(1) 0.2591(1) 0.6487(2) 0.012(1)

O5 0.4084(1) 0.4450(1) 0.7310(2) 0.014(1)

O6 0.4103(1) 0.3870(1) 0.4352(2) 0.019(1)

C1 0.7444(2) 0.1401(2) 0.5360(3) 0.014(1)

C2 0.6627(2) 0.2970(2) 0.4150(3) 0.014(1)

N 0.6532(1) 0.2076(2) 0.5280(2) 0.012(1)

H12 0.666(2) 0.270(2) 0.305(3) 0.008(6)

H22 0.601(2) 0.341(2) 0.423(4) 0.017(7)

H11 0.747(2) 0.109(2) 0.429(3) 0.004(6)

H21 0.738(2) 0.085(2) 0.612(4) 0.011(7)

H1n 0.598(2) 0.170(2) 0.494(3) 0.015(7)

H2n 0.635(2) 0.225(2) 0.624(4) 0.026(8)

H5 0.476(5) 0.457(4) 0.751(12) 0.035(22)

H6 0.400(2) 0.442(2) 0.388(4) 0.021(8)

______________________________________________________________________________

Atom *U11* *U22* *U33* *U12 U13 U23*

______________________________________________________________________________

Co, Zn 0.0064(1) 0.0070(1) 0.0066(1) 0.0006(1) 0.0006(1) 0.0004(1)

P1 0.0073(4) 0.0070(4) 0.0056(4) 0.0000 0.0014(3) 0.0000

P2 0.0084(3) 0.0072(3) 0.0092(3) 0.0006(2) 0.0005(2) 0.0001(2)

O1 0.010(1) 0.012(1) 0.009(1) -0.002(1) 0.003(1) -0.002(1)

O2 0.013(1) 0.014(1) 0.011(1) -0.004(1) 0.003(1) -0.004(1)

O3 0.011(1) 0.017(1) 0.025(1) 0.002(1) -0.005(1) -0.005(1)

O4 0.019(1) 0.008(1) 0.009(1) 0.003(1) 0.002(1) -0.001(1)

O5 0.010(1) 0.013(1) 0.018(1) 0.001(1) -0.003(1) -0.006(1)

O6 0.031(1) 0.012(1) 0.016(1) 0.003(1) 0.011(1) 0.004(1)

C1 0.016(1) 0.011(1) 0.016(1) -0.001(1) 0.005(1) 0.000(1)

C2 0.013(1) 0.017(1) 0.013(1) 0.000(1) 0.000(1) 0.004(1)

N 0.012(1) 0.013(1) 0.011(1) -0.005(1) 0.003(1) -0.003(1)

______________________________________________________________________________

**Table 2.** Interatomic distances (in Å) of [(Co0.44(1)Zn0.56(1))2(PO4)(H1.5PO4)2]C4H8N2H4. Standard deviations in parentheses. Symmetry operations give positions of the oxygen atoms with reference to the positions listed in Table 1. Oxygen atoms from Ref. 8 are listed with the nomenclature given in this reference.

______________________________________________________________________________

Co, Zn - O3 *i* 1.922(2) Zn - O3 1.914(3) Ref. 8

Co, Zn - O1 1.932(2) Zn - O1 1.919(3) Ref. 8

Co, Zn - O2 *j* 1.933(2) Zn - O2 1.932(3) Ref. 8

Co, Zn - O4 1.975(2) Zn - O4 1.966(3) Ref. 8

P1 - O2 1.530(2)

P1 - O1 1.546(2)

P2 - O3 1.501(2)

P2 - O4 1.517(2)

P2 - O5 1.545(2)

P2 - O6 1.579(2)

C1 - N 1.497(3)

C1 - C2 *m* 1.513(3)

C2 - N 1.487(3)

O5 - H5 0.92(7)

O5 - H5 *l* 1.55(7)

O6 - H6 0.813(32)

C1 - H21 0.948(30)

C1 - H11 0.965(26)

C2 - H12 0.970(27)

C2 - H22 1.006(28)

N - H2n 0.869(34)

N - H1n 0.910(29)

O1 - H1n 1.782(30)

N - O1 2.682(3) hydrogen bond

O4 *l* - H2n 1.943(35)

N - O4 *l* 2.803(3) hydrogen bond

O5 - H5 0.92(7)

O5 *l* - H5 1.55(7)

O5 - O5 *l* 2.451(3) hydrogen bond

O6 - H6 0.813(32)

O5 *n* - H6 1.915(32)

O6 - O5 *n* 2.731(3) hydrogen bond

O1 - Co, Zn - O3 *i* 112.02(8)

O2 *j* - Co, Zn - O3 *i* 114.02(7)

O3 *i* - Co, Zn - O4 108.40(7)

O1 - Co, Zn - O2 *j* 108.28(7)

O1 - Co, Zn - O4 110.29(7)

O2 *j* - Co, Zn - O4 103.48(7)

O2 *j* - Co, Zn - O4 103.48(7)

O2 - P1 - O2 *k* 112.6(1)

O1 - P1 - O2 108.37(8)

O1 *k* - P1 - O2 110.08(9)

O1 - P1 - O2 *k* 110.08(9)

O1 *k* - P1 - O2 *k* 108.37(8)

O1 - P1 - O1 *k* 107.2(1)

O3 - P2 - O4 114.2(1)

O3 - P2 - O5 108.1(1)

O3 - P2 - O6 111.4(1)

O4 - P2 - O5 109.6(1)

O4 - P2 - O6 104.9(1)

O5 - P2 - O6 108.6(1)

______________________________________________________________________________

Symmetry operations:

*i* 0.5 -1 0 0 0.5 0 -1 0 1.0 0 0 -1

*j* 0.0 1 0 0 0.0 0 -1 0 0.5 0 0 1

*k* 1.0 -1 0 0 0.0 0 1 0 0.5 0 0 -1

*l* 1.0 -1 0 0 0.0 0 1 0 1.5 0 0 -1

*m* 1.5 -1 0 0 0.5 0 -1 0 1.0 0 0 -1

*n* 0.0 1 0 0 1.0 0 -1 0 -0.5 0 0 -1

______________________________________________________________________________

**Table 3.**  Atomic coordinates and thermal displacement parameters for [(Co0.25(3)Zn0.75(3))(HPO4)2]C5N2H14.

______________________________________________________________________________

Atom *x/a* *y/b*  *z/c* *Uij/Uiso*

______________________________________________________________________________

Co,Zn 0.73644(5) 0.47128(3) 0.46706(4) 0.0177(2) Uij

P1 0.45788(10) 0.57996(6) 0.31148(8) 0.0201(5) Uij

P2 1.04744(10) 0.41162(6 0.35732(9) 0.0197(4) Uij

O1 0.3806(3) 0.6116(2) 0.4261(2) 0.026(1) Uij

O2 0.5687(3) 0.4920(2) 0.3349(2) 0.028(1) Uij

O3 0.3256(3) 0.5458(2) 0.2110(3) 0.034(2) Uij

O4 0.5438(3) 0.6662(2) 0.2580(3) 0.034(2) Uij

O5 1.0554(3) 0.5119(2) 0.2949(2) 0.029(1) Uij

O6 1.0900(3) 0.3310(2) 0.2617(3) 0.035(2) Uij

O7 0.8879(3) 0.3864(2) 0.3991(2) 0.028(1) Uij

O8 1.1769(3) 0.4052(2) 0.4638(2) 0.026(1) Uij

N1 0.8517(3) 0.6666(2) 0.2420(3) 0.027(2) Uij

N2 1.0770(4) 0.7970(3) 0.1558(5) 0.054(3) Uij

C1 0.9000(5) 0.7570(3) 0.3126(4) 0.043(3) Uij

C2 1.0661(6) 0.7843(3) 0.2872(6) 0.057(3) Uij

C3 1.0296(5) 0.7074(3) 0.0833(4) 0.045(3) Uij

C4 0.8644(5) 0.6774(3) 0.1065(4) 0.036(2) Uij

C5 0.8162(7) 0.5814(4) 0.0417(5) 0.061(3) Uij

H6 1.048(7) 0.281(4) 0.261(5) 0.07(2) Uiso

H3 0.248(8) 0.537(4) 0.237(6) 0.09(2) Uiso

H2B 1.011 0.849 0.127 0.07 Uiso

H2A 1.180 0.812 0.142 0.07 Uiso

H1D 0.896 0.745 0.398 0.05 Uiso

H1C 0.832 0.809 0.288 0.05 Uiso

H1B 0.748 0.652 0.255 0.04 Uiso

H1A 0.917 0.614 0.271 0.04 Uiso

H3A 1.099 0.656 0.107 0.06 Uiso

H3B 1.034 0.721 -0.002 0.06 Uiso

H4A 0.795 0.728 0.076 0.05 Uiso

H5C 0.825 0.588 -0.043 0.08 Uiso

H5B 0.714 0.565 0.056 0.08 Uiso

H5A 0.884 0.531 0.073 0.08 Uiso

H2D 1.093 0.844 0.329 0.07 Uiso

H2C 1.133 0.734 0.318 0.07 Uiso

______________________________________________________________________________

**Table 4.** Interatomic distances in Å of [(Co0.25(3)Zn0.75(3))(HPO4)2]C5N2H14.

______________________________________________________________________________

Symmetry operations:

*i* 2.0 -1 0 0 1.0 0 -1 0 1.0 0 0 -1

*j*  1.0 -1 0 0 1.0 0 -1 0 1.0 0 0 -1

______________________________________________________________________________

Distances:

Co,Zn - O7 1.954(2)

Co,Zn - O8 *i* 1.973(3)

Co,Zn - O1 *j* 1.977(2)

Co,Zn - O2 1.982(3)

P1 - O4 1.540(3)

P1 - O1 1.540(3)

P1 - O2 1.548(3)

P1 - O3 1.590(3)

P2 - O5 1.537(3)

P2 - O7 1.539(3)

P2 - O8 1.550(3)

P2 - O6 1.588(3)

N1 - C1 1.498(5)

N1 - C4 1.508(5)

N2 - C2 1.464(7)

N - C3 1.499(7)

C1 - C2 1.541(7)

C3 - C4 1.537(6)

C4 - C5 1.533(7)

______________________________________________________________________________
